# Supplementary material
Source: PubMed Central journal article supplement (PMC8254657)

Supplemental Figure 1

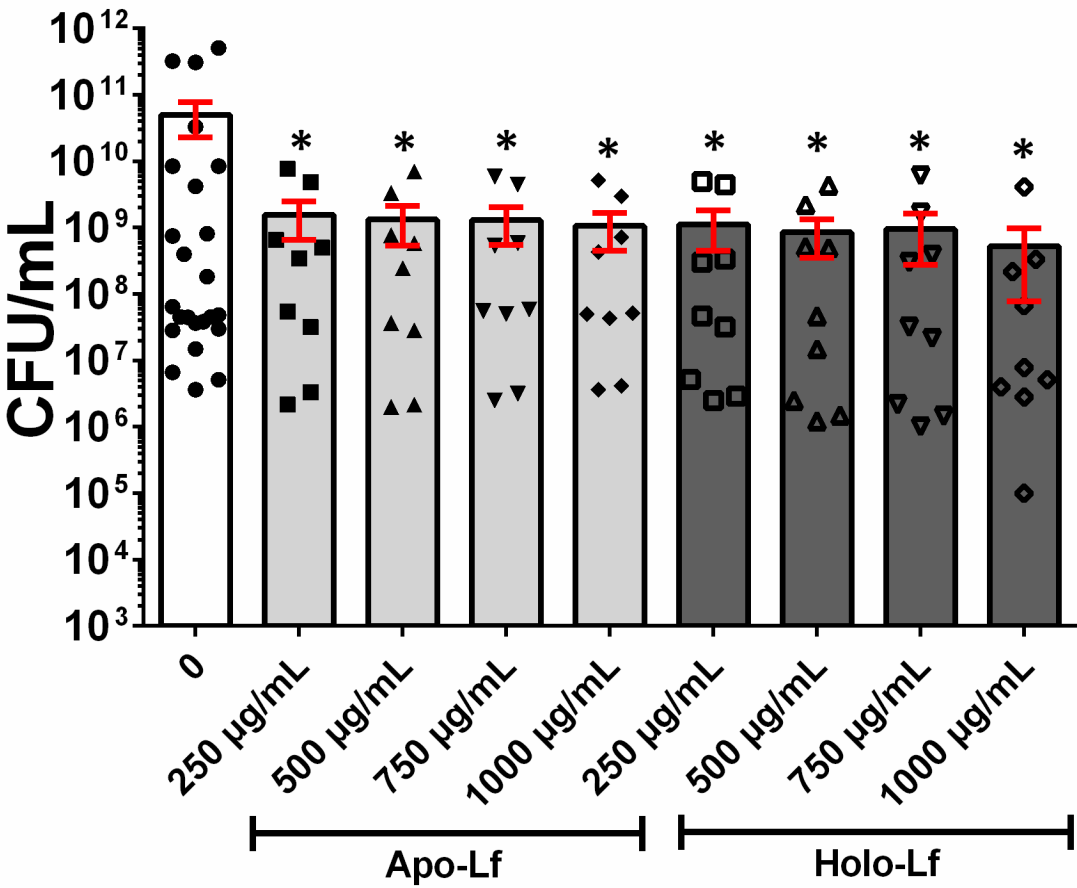

Supplement: NIHMS1709533-supplement-1.pdf [file NIHMS1709533-supplement-1.pdf]
